# Supplementary material
Source: Research Square preprint supplement (doi:10.21203/rs.3.rs-9428328/v1)
Supplement: Supplementary file 1 [file 695796dedd4f5aa6016aaf72.docx]

**Supplemental information for**

**Community Assembly Mechanisms Facilitate Understanding of Microbial Responses to Habitat Succession along a Spatial Environmental Continuum in Alpine Plateaus**

**Authors:** Wenrui Wang a, Changjiang Huang b, *, Congrui Liu a, *

**Affiliations:**

a Department of Biotechnology, Aulin College, Northeast Forestry University, Harbin 150040, China

b Institute of Carbon Neutrality, Key Laboratory of Sustainable Forest Ecosystem Management-Ministry of Education, School of Ecology, Northeast Forestry University, Harbin 150040, China.

***Corresponding authors:**

Congrui Liu, liucongrui07@gmail.com

Changjiang Huang, cj_huang124@nefu.edu.cn

**This file includes:**

Data Availability Link and Captions for Tables S1 to S13

Figures S1 to S4

**Tables S1-S13 are shown in different sheets in the “Supplementary Tables.xlsx” file.**

**Table S1.** Sampling information of 36 investigated soils in this study, including edaphic factors, geographic factors, climatic factors.

**Table S2.** Relative abundance of bacterial phyla across wetlands, grasslands, and barelands.

**Table S3.** Alpha diversity metrics of bacterial communities across wetlands, grasslands, and barelands, including species richness, Chao1, ACE, Shannon, Inverse Simpson, Fisher, Pielou, Coverage and Faith's phylogenetic diversity.

**Table S4.** Dissimilarities in bacterial community composition among wetlands, grasslands, and barelands as determined by ADONIS, ANOSIM, and MRPP.

**Table S5.** Results of Mantel Test examining the correlation between environmental variables (Longitude, Latitude, Elevation, MAT, MAP, pH, Soil total salt, TN, TP and TK) and bacterial community composition across wetlands, grasslands, and barelands.

**Table S6.** Correlations between major taxa of bacteria and explanatory variables in wetlands.

**Table S7.** Correlations between major taxa of bacteria and explanatory variables in grasslands.

**Table S8.** Correlations between major taxa of bacteria and explanatory variables in barelands.

**Table S9.** Summary of the topological parameters of ecological networks of bacteria across wetlands, grasslands, and barelands.

**Table S10.** Contributions of various assembly processes to bacterial communities across wetlands, grasslands, and barelands.

**Table S11.** Taxonomic classification of bacteria, including kingdom, phylum, class, order, family, and genus, with corresponding ASV IDs and bin sequences.

**Table S12.** Relative contributions of different bins to the assembly of soil microbial communities across wetlands, grasslands, and barelands.

**Table S13.** PLS-PM accounting for the direct and indirect effects of multiple variables (space, climate, soil, and microbial properties) on soil microbial functional potential across three habitat types of the Pamir Plateau.

**Figure S1 – S4** are shown below

**
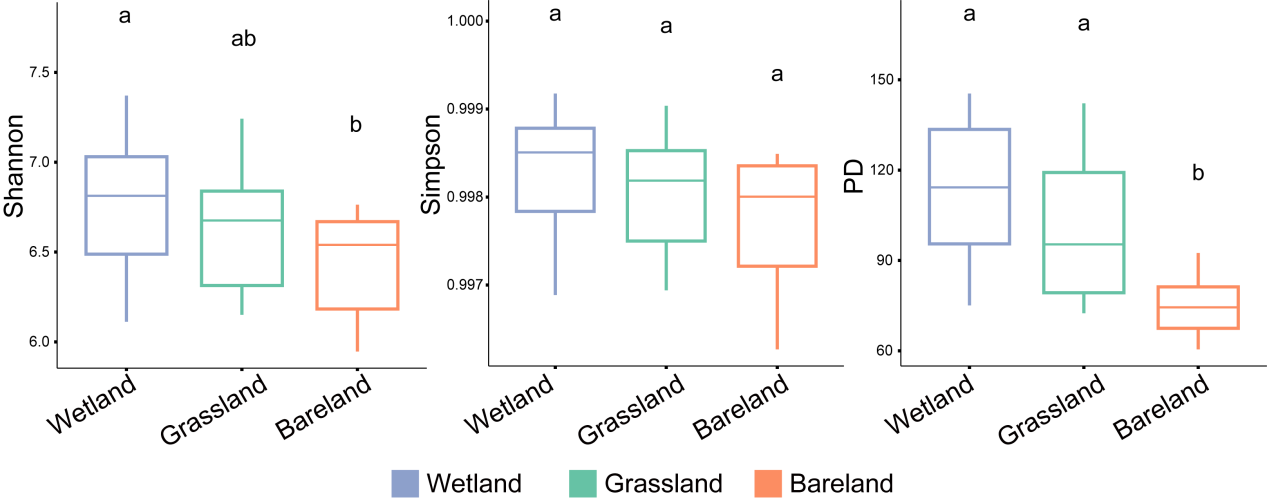
Fig. S1. Soil bacterial alpha diversity across wetlands, grasslands, and barelands.** The boxplots show the differences in three alpha diversity indices: Shannon, Simpson, and Phylogenetic Diversity (PD). Different letters above the boxplots indicate significant differences at *P* < 0.05.

**
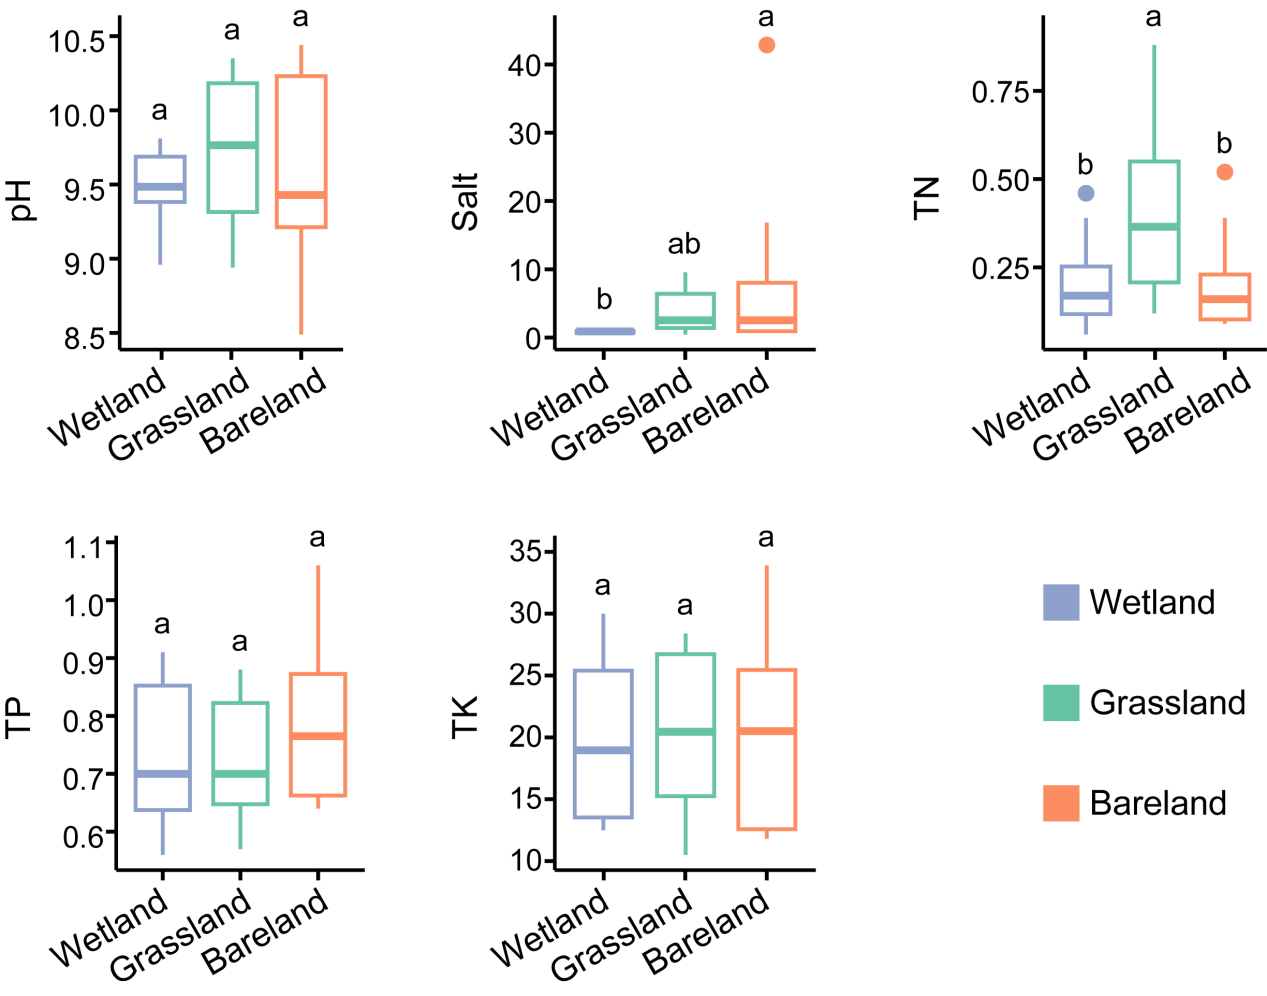
Fig. S2. Basic physicochemical properties of soil.** The figure illustrates differences in edaphic variables, including soil pH, soil total salt content, total nitrogen (TN), total phosphorus (TP), and total potassium (TK) along the wetland-grassland-bareland continuum. Different letters above the boxes indicate significant differences at *P* < 0.05.


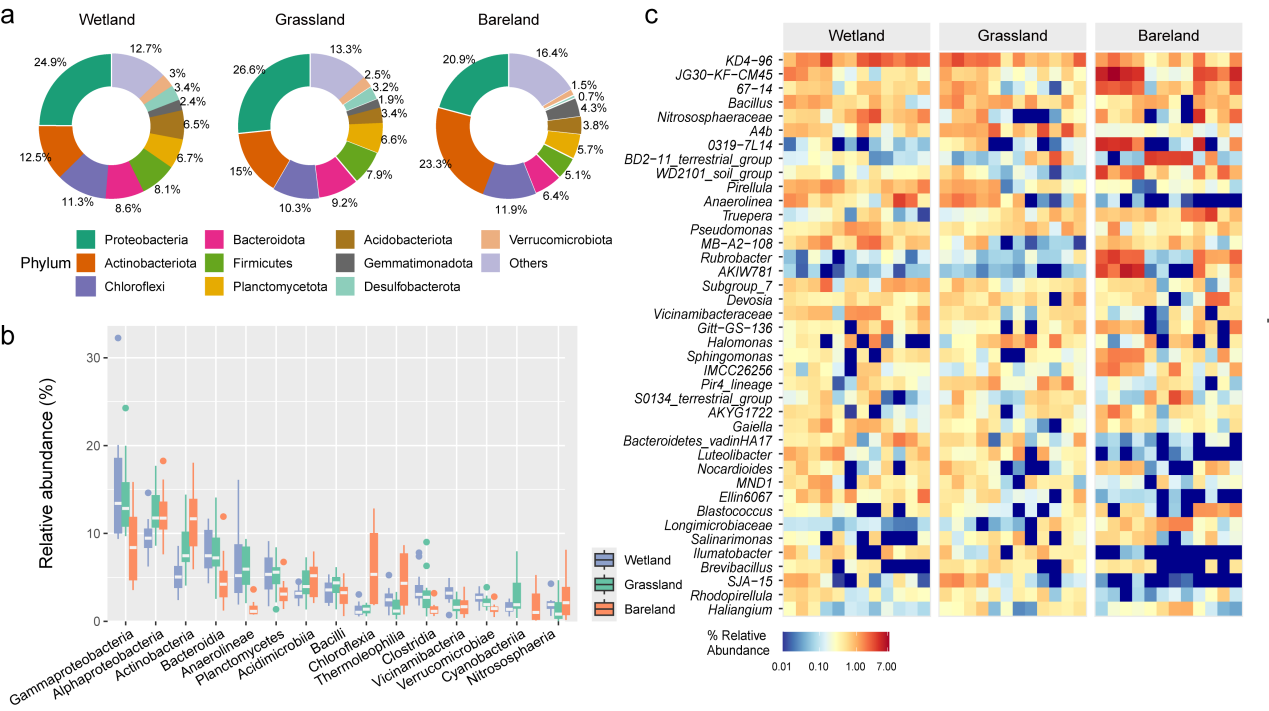


**Fig. S3. Compositional variations of soil bacterial communities along the wetland-grassland-bareland continuum.** (a) Donut charts illustrating the relative abundances of dominant bacterial phyla across the three habitat types. (b) Boxplots comparing the relative abundances of major bacterial classes across wetland (blue), grassland (green), and bareland (orange) soils. (c) Heatmap showing the distribution patterns and relative abundances of dominant bacterial genera across the samples. Higher relative abundance is indicated in red, and lower relative abundance is indicated in blue.


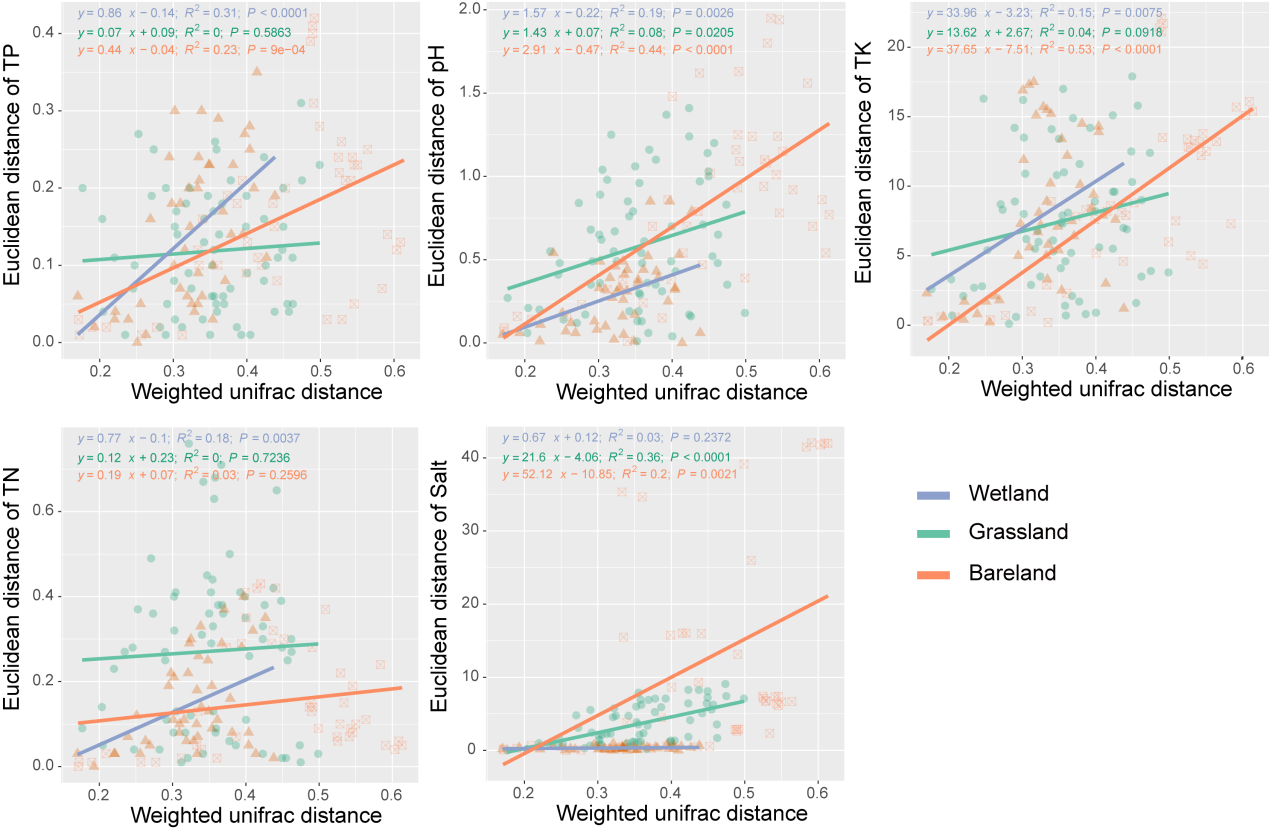


**Fig. S4. Correlation scatter plots between soil microbial communities and environmental variables across wetlands, grasslands, and barelands.** Scatter plots showing the correlation between weighted UniFrac distances of bacterial communities and Euclidean distances of physicochemical factors across the successional continuum.
