# Supplementary material
Source: Research Square preprint supplement (doi:10.21203/rs.3.rs-9428328/v1)
Supplement: Supplementary file 2 [file 95c3ad8f8007b78cb7c9e07f.xlsx]

## Sheet: TableS1
Table S1. Sampling information of 36 investigated soils in this study, including edaphic factors, geographic factors, climatic factors.
Type	Group	Wetland1	Wetland2	Wetland3	Wetland4	Wetland5	Wetland6	Wetland7	Wetland8	Wetland9	Wetland10	Wetland11	Wetland12	Grassland1	Grassland2	Grassland3	Grassland4	Grassland5	Grassland6	Grassland7	Grassland8	Grassland9	Grassland10	Grassland11	Grassland12	Bareland1	Bareland2	Bareland3	Bareland4	Bareland5	Bareland6	Bareland7	Bareland8	Bareland9	Bareland10	Bareland11	Bareland12
Edaphic factora	pH	9.37	9.42	9.48	9.49	9.81	9.84	9.81	9.75	9.29	8.96	9.5	9.32	9.35	9.15	8.94	9.21	9.83	10.35	10	10.31	9.64	10.18	10.19	9.7	9.35	9.51	9.28	9.19	10.29	10.05	10.44	10.43	8.76	8.81	8.49	8.61
	Salt (g/kg)	0.68	0.89	0.51	0.93	1.2	0.89	0.68	0.54	0.9	0.92	1.42	1	0.46	1.45	1.26	1.27	2.12	7.69	2.44	8.35	2.61	9.54	3.55	5.99	0.8	0.82	0.87	1.09	8.2	42.85	3.71	7.51	1.32	16.85	1.37	1.52
	TN (g/kg)	0.2	0.17	0.17	0.14	0.09	0.07	0.06	0.11	0.28	0.46	0.39	0.27	0.25	0.48	0.53	0.62	0.21	0.23	0.17	0.12	0.88	0.2	0.61	0.5	0.1	0.09	0.1	0.11	0.17	0.15	0.24	0.2	0.26	0.52	0.39	0.35
	TP (g/kg)	0.62	0.68	0.66	0.63	0.91	0.59	0.56	0.72	0.77	0.83	0.86	0.86	0.57	0.68	0.64	0.84	0.67	0.72	0.65	0.63	0.83	0.88	0.82	0.77	0.64	0.65	0.67	0.66	0.88	0.78	1.06	0.9	0.7	0.75	0.85	0.78
	TK (g/kg)	14.8	12.5	13.1	12.7	27	30.3	30	28.2	18.2	20.6	19.8	18.1	10.5	12.6	13.3	15.9	26.8	28.4	26.7	27.5	21.5	22.9	18.8	19.4	12.2	11.8	12.5	12.8	25.6	27.9	33.9	25	17.9	20.4	20.6	19.6
Geographic factorb	Longitude (°)	74.8424	74.8424	74.8424	74.8424	75.2265	75.2265	75.2265	75.2265	74.5811	74.5811	74.5811	74.5811	74.8424	74.8424	74.8424	74.8424	75.2265	75.2265	75.2265	75.2265	74.5811	74.5811	74.5811	74.5811	74.8424	74.8424	74.8424	74.8424	75.2265	75.2265	75.2265	75.2265	74.5811	74.5811	74.5811	74.5811
	Latitude (°)	38.8516	38.8516	38.8516	38.8516	37.883	37.883	37.883	37.883	38.9393	38.9393	38.9393	38.9393	38.8516	38.8516	38.8516	38.8516	37.883	37.883	37.883	37.883	38.9393	38.9393	38.9393	38.9393	38.8516	38.8516	38.8516	38.8516	37.883	37.883	37.883	37.883	38.9393	38.9393	38.9393	38.9393
	Elevation (m)	3408	3408	3408	3408	3046	3046	3046	3046	3507	3507	3507	3507	3408	3408	3408	3408	3046	3046	3046	3046	3507	3507	3507	3507	3408	3408	3408	3408	3046	3046	3046	3046	3507	3507	3507	3507
Climatic factorc	MAT (°C)	0.8583	0.8583	0.8583	0.8583	4.5667	4.5667	4.5667	4.5667	0.2125	0.2125	0.2125	0.2125	0.8583	0.8583	0.8583	0.8583	4.5667	4.5667	4.5667	4.5667	0.2125	0.2125	0.2125	0.2125	0.8583	0.8583	0.8583	0.8583	4.5667	4.5667	4.5667	4.5667	0.2125	0.2125	0.2125	0.2125
	MAP (mm)	88	88	88	88	55	55	55	55	89	89	89	89	88	88	88	88	55	55	55	55	89	89	89	89	88	88	88	88	55	55	55	55	89	89	89	89
aEdaphic factors contain soil pH, the content of soil total salt (Salt), the content of total nitrogen (TN), the content of total phosphorus (TP), and the content of total potassium (TK).
bGeographic factors contain Elevation, Longitude, and Latitude.
cClimatic factors contain mean annual temperature (MAT) and precipitation (MAP).

## Sheet: TableS2
Table S2. Relative abundance of bacterial phyla across wetlands, grasslands, and barelands.
Phylum	Wetland			Grassland			Bareland
	Meana	SDb	Sigc	Mean	SD	Sig	Mean	SD	Sig
Proteobacteria	22.8186	4.41788	a	26.75	5.66167	a	21.1786	7.1376	a
Actinobacteriota	12.7155	1.7495	b	15.061	4.0586	ab	22.4182	8.56121	a
Chloroflexi	12.2682	3.89371	a	10.2466	3.39914	a	11.7727	5.44875	a
Firmicutes	8.55318	3.02089	a	7.86439	3.56545	a	4.95955	2.10728	a
Bacteroidota	7.96227	2.45726	a	9.30568	3.7641	a	6.77091	2.77176	a
Planctomycetota	7.38955	2.20017	a	6.5947	2.22957	a	6.10136	1.82579	a
Acidobacteriota	6.58227	2.22572	a	3.42727	1.58853	a	3.43364	1.67321	a
Desulfobacterota	3.35955	2.60809	a	3.21326	2.26104	a	0.730455	0.427998	b
Verrucomicrobiota	3.13773	1.01906	a	2.47992	0.729502	a	1.50364	0.617367	b
Gemmatimonadota	2.52909	1.74038	a	1.96212	1.16174	a	4.74545	3.15423	a
aMean values represent the average value within groups.
bSD denotes standard deviation
cSig indicates the significance of difference between groups. Values within the same row followed by different letters are significantly different at P < 0.05. Multi-group data for non-parametric test was adopted by Kruskal-Wallis test.

## Sheet: TableS3
Table S3. Alpha diversity metrics of bacterial communities across wetlands, grasslands, and barelands, including species richness, Chao1, ACE, Shannon, Inverse Simpson, Fisher, Pielou, Coverage and Faith's phylogenetic diversity.
Measure	Wetland			Grassland			Bareland
	Meana	SDb	Sigc	Mean	SD	Sig	Mean	SD	Sig
Observed	1596.5	489.57	a	1388.25	417.905	ab	1100	252.914	b
Chao1	1733.38	581.998	a	1495.5	495.548	ab	1168.5	293.659	b
ACE	1720.19	565.949	a	1496.18	494.113	ab	1164.36	291.427	b
Shannon	6.75794	0.403539	a	6.60835	0.338254	ab	6.42918	0.304939	b
Simpson	0.998228	0.00080451	a	0.998019	0.000669281	a	0.997701	0.000792919	a
InvSimpson	670.23	280.2	a	565.407	208	a	478.652	144.382	a
Fisher	404.816	161.913	a	336.198	132.965	ab	246.348	71.1735	b
Pielou	0.921285	0.0155574	a	0.918172	0.0106973	a	0.921039	0.0143498	a
Coverage	0.990286	0.00529298	a	0.991883	0.00485668	a	0.994909	0.00247216	a
PDd	113.783	23.1573	a	99.6822	23.1213	a	75.4574	10.9394	b
aMean values represent the average value within groups.
bSD represents standard deviation
cSig represents the significance of difference between groups. Values within the same row followed by different letters are significantly different at P < 0.05. Multi-group data for non-parametric test was adopted by Kruskal-Wallis test.
dPD: Faith's phylogenetic diversity

## Sheet: TableS4
Table S4. Dissimilarities in bacterial community composition among wetlands, grasslands, and barelands as determined by ADONIS, ANOSIM, and MRPP.
Methoda	ADONIS		ANOSIM		MRPP
Statistic	R2	P-value	R	P-value	δb	P-value
Total	0.198695	0.001	0.346983	0.001	0.372939	0.001
Wetland vs Grassland	0.0915145	0.017	0.1021	0.041	0.3415	0.018
Wetland vs Bareland	0.208159	0.001	0.4836	0.001	0.3847	0.001
Grassland vs Bareland	0.157989	0.001	0.4104	0.001	0.3937	0.001
aADONIS, analysis of variance; ANOSIM, analysis of similarity; MRPP, multi-response permutation procedure.
bδ, MRPP. Delta

## Sheet: TableS5
Table S5. Results of Mantel Test examining the correlation between environmental variables (Longitude, Latitude, Elevation, MAT, MAP, pH, Soil total salt, TN, TP and TK) and bacterial community composition across wetlands, grasslands, and barelands.
Variables	Wetland				Grassland				Bareland				Total
	r	p	rd	pd	r	p	rd	pd	r	p	rd	pd	r	p	rd	pd
Longitude	0.518648	0.002	>= 0.5	0.001 - 0.01	0.330501	0.007	0.2 - 0.5	0.001 - 0.01	0.650857	0.004	>= 0.5	0.001 - 0.01	0.262266	0.001	0.2 - 0.5	< 0.001
Latitude	0.42711	0.022	0.2 - 0.5	0.01 - 0.05	0.250559	0.056	0.2 - 0.5	>= 0.05	0.556408	0.01	>= 0.5	0.001 - 0.01	0.291624	0.001	0.2 - 0.5	< 0.001
Elevation	0.473546	0.008	0.2 - 0.5	0.001 - 0.01	0.286926	0.025	0.2 - 0.5	0.01 - 0.05	0.606316	0.009	>= 0.5	0.001 - 0.01	0.289358	0.001	0.2 - 0.5	< 0.001
MAT	0.450387	0.009	0.2 - 0.5	0.001 - 0.01	0.268531	0.03	0.2 - 0.5	0.01 - 0.05	0.581633	0.004	>= 0.5	0.001 - 0.01	0.291659	0.001	0.2 - 0.5	< 0.001
MAP	0.408409	0.019	0.2 - 0.5	0.01 - 0.05	0.23631	0.063	0.2 - 0.5	>= 0.05	0.535887	0.009	>= 0.5	0.001 - 0.01	0.290389	0.001	0.2 - 0.5	< 0.001
pH	0.438749	0.022	0.2 - 0.5	0.01 - 0.05	0.284754	0.032	0.2 - 0.5	0.01 - 0.05	0.584712	0.009	>= 0.5	0.001 - 0.01	0.374057	0.001	0.2 - 0.5	< 0.001
Salt	0.179835	0.191	< 0.2	>= 0.05	0.600495	0.001	>= 0.5	< 0.001	-0.0326217	0.506	< 0.2	>= 0.05	0.521809	0.001	>= 0.5	< 0.001
TN	0.423774	0.019	0.2 - 0.5	0.01 - 0.05	0.0443503	0.329	< 0.2	>= 0.05	0.221146	0.086	0.2 - 0.5	>= 0.05	-0.0577588	0.71	< 0.2	>= 0.05
TP	0.554034	0.002	>= 0.5	0.001 - 0.01	0.068221	0.28	< 0.2	>= 0.05	0.0749817	0.264	< 0.2	>= 0.05	0.163285	0.035	< 0.2	0.01 - 0.05
TK	0.393642	0.019	0.2 - 0.5	0.01 - 0.05	0.209251	0.076	0.2 - 0.5	>= 0.05	0.224983	0.086	0.2 - 0.5	>= 0.05	0.283796	0.001	0.2 - 0.5	< 0.001

## Sheet: TableS6
Table S6. Correlations between major taxa of bacteria and explanatory variables in wetlands.
Variables	Statics	KD4-96	Anaerolinea	WD2101_soil_group	A4b	Pirellula	Truepera	MB-A2-108	Longimicrobiaceae	Nitrososphaeraceae	Luteolibacter	Ellin6067	IMCC26256	Vicinamibacteraceae	Bacteroidetes_vadinHA17	OPB41	Halomonas	Subgroup_7	Nodosilinea_PCC-7104	Pir4_lineage	Ilumatobacter	SJA-15	MND1	Subgroup_17	RB41	Aquiflexum
Altitude	r	-0.121391	0.612082	0.391876	0.0360862	0.389735	-0.904084	-0.524747	-0.11259	-0.463957	0.12087	0.49791	-0.434448	-0.252815	0.590651	0.247785	-0.49183	0.65519	0.240235	-0.292542	0.385233	0.311568	0.0626185	0.694345	-0.674211	-0.490876
	P	0.738336	0.059993	0.262727	0.921164	0.265575	0.000329351	0.119399	0.756807	0.176789	0.739426	0.14305	0.209619	0.480979	0.0721911	0.490041	0.148776	0.0397498	0.503779	0.412076	0.27162	0.380842	0.863558	0.0258858	0.0325116	0.149687
Latitude	r	-0.150304	0.569384	0.412472	0.0765905	0.408301	-0.898268	-0.505731	-0.0135097	-0.524598	0.169055	0.486273	-0.427951	-0.244657	0.507498	0.150547	-0.477648	0.659034	0.222215	-0.260258	0.415435	0.399634	0.138735	0.619865	-0.69532	-0.497799
	P	0.678537	0.085787	0.23619	0.833438	0.241437	0.00041379	0.135885	0.970453	0.119523	0.64058	0.15413	0.217286	0.495713	0.134297	0.678042	0.162667	0.0382075	0.537205	0.467706	0.232502	0.252547	0.702292	0.055924	0.0255906	0.143153
Longitude	r	0.0695502	-0.656044	-0.342369	0.0310184	-0.343605	0.876269	0.533942	0.268467	0.346608	-0.0378292	-0.496255	0.427078	0.255619	-0.701033	-0.395108	0.494549	-0.621978	-0.259534	0.332794	-0.320438	-0.156066	0.0632714	-0.786406	0.612244	0.459443
	P	0.848593	0.0394036	0.332853	0.932212	0.330995	0.000880864	0.111898	0.453257	0.326505	0.917367	0.144595	0.218329	0.47596	0.0239078	0.258459	0.146199	0.0548517	0.46899	0.347422	0.36669	0.666799	0.862146	0.00697351	0.0599064	0.1816
MAP	r	-0.160315	0.550707	0.418101	0.0912737	0.413196	-0.891687	-0.496172	0.0233962	-0.544565	0.18614	0.479553	-0.423431	-0.240421	0.474084	0.113652	-0.470025	0.657221	0.214422	-0.246974	0.424621	0.430412	0.166353	0.589123	-0.699749	-0.497924
	P	0.658186	0.0989978	0.229212	0.801994	0.235286	0.000527364	0.144673	0.948849	0.103608	0.606636	0.160757	0.222714	0.503439	0.166275	0.754573	0.170444	0.0389299	0.551929	0.49151	0.221277	0.214364	0.646006	0.0731173	0.0242794	0.143037
MAT	r	0.136747	-0.591318	-0.403554	-0.057275	-0.40035	0.903241	0.51611	0.0612448	0.496672	-0.146265	-0.493052	0.432114	0.249177	-0.54876	-0.197726	0.485631	-0.658778	-0.231428	0.27643	-0.4019	-0.358201	-0.102424	-0.657223	0.686839	0.49567
	P	0.706397	0.0717887	0.247488	0.875121	0.251618	0.000340726	0.126724	0.866528	0.144205	0.686802	0.147615	0.212355	0.487527	0.100445	0.583991	0.154755	0.038309	0.520005	0.439435	0.249616	0.309469	0.778283	0.0389291	0.0282359	0.145143
pH	r	0.229874	-0.775377	-0.32829	0.103484	-0.176963	0.772412	0.587414	0.215762	0.332674	0.108594	-0.383657	0.394662	0.349519	-0.755831	-0.333088	0.320399	-0.529713	-0.15324	0.144206	-0.190509	-0.326891	0.00798207	-0.514229	0.595984	0.427818
	P	0.522889	0.00840757	0.354386	0.776038	0.62479	0.00882605	0.074163	0.549386	0.347607	0.765232	0.273754	0.259045	0.322183	0.0114415	0.346971	0.366752	0.11531	0.672549	0.691027	0.59806	0.356563	0.98254	0.128354	0.0690171	0.217445
Salt	r	0.00964895	0.355597	-0.293298	-0.247009	0.375321	-0.416767	-0.488389	-0.694186	-0.321152	0.392119	0.169833	-0.699035	-0.539788	0.469872	0.763961	-0.498017	0.225635	0.152056	-0.731565	0.510471	-0.368889	-0.594279	0.575387	-0.495319	0.379216
	P	0.978895	0.313254	0.410812	0.491446	0.285192	0.230856	0.152078	0.0259342	0.365563	0.262404	0.639022	0.0244874	0.107286	0.170602	0.0100994	0.142951	0.530794	0.674962	0.0161858	0.131652	0.294189	0.0700215	0.081795	0.145474	0.279816
TK	r	0.209279	-0.253402	-0.454002	-0.101568	-0.521849	0.733178	0.370371	-0.302747	0.654534	-0.381058	-0.461934	0.410398	0.205449	-0.103293	0.209882	0.32959	-0.558248	-0.19576	0.207605	-0.490213	-0.571016	-0.383139	-0.238048	0.687296	0.366699
	P	0.561732	0.479927	0.1875	0.780097	0.121826	0.0158341	0.292102	0.395176	0.0400174	0.277292	0.178936	0.238791	0.569075	0.776441	0.560579	0.352369	0.0935186	0.587811	0.564937	0.150322	0.0846898	0.274457	0.507789	0.0280887	0.297286
TN	r	-0.0870097	0.862055	0.229276	-0.155207	-0.00882274	-0.661669	-0.536532	-0.500535	-0.157829	-0.229834	0.138505	-0.383064	-0.401758	0.945459	0.706008	-0.306403	0.394256	-0.0102616	-0.246686	0.111346	0.00343392	-0.308808	0.835236	-0.434133	-0.317201
	P	0.811101	0.00133672	0.524003	0.668545	0.980702	0.0371738	0.109839	0.14062	0.663222	0.522965	0.702765	0.27456	0.249798	3.62374e-05	0.0225057	0.389203	0.259581	0.977555	0.492031	0.759428	0.992488	0.385299	0.00262951	0.209988	0.371824
TP	r	-0.152482	0.273559	-0.0403458	-0.747333	0.292991	-0.251162	-0.510948	-0.687223	0.0106702	0.170546	0.200413	-0.565804	-0.583469	0.586029	0.80807	-0.0522704	-0.110678	0.298902	-0.743487	0.22647	-0.532453	-0.578533	0.370104	-0.301802	0.492538
	P	0.674093	0.444397	0.911887	0.0129732	0.411325	0.48395	0.131231	0.0281123	0.976662	0.637594	0.578784	0.0882258	0.0766132	0.0750171	0.00467576	0.88597	0.760835	0.401503	0.0137113	0.529232	0.113091	0.0797522	0.292477	0.396727	0.148102

## Sheet: TableS7
Table S7. Correlations between major taxa of bacteria and explanatory variables in grasslands.
Variables	Statics	KD4-96	Anaerolinea	WD2101_soil_group	A4b	Pirellula	Truepera	MB-A2-108	Longimicrobiaceae	Nitrososphaeraceae	Luteolibacter	Ellin6067	IMCC26256	Vicinamibacteraceae	Bacteroidetes_vadinHA17	OPB41	Halomonas	Subgroup_7	Nodosilinea_PCC-7104	Pir4_lineage	Ilumatobacter	SJA-15	MND1	Subgroup_17	RB41	Aquiflexum
Altitude	r	0.235875	0.0214958	0.129146	0.310962	0.194244	0.205433	0.224566	0.655895	0.331319	-0.20888	0.224411	-0.245421	0.718666	0.0994435	-0.413329	-0.526406	0.571839	-0.0672063	0.400461	0.106678	0.217281	0.234466	0.229248	0.0253723	-0.0799147
	P	0.460488	0.947133	0.689143	0.325207	0.545224	0.521831	0.48287	0.0205586	0.292796	0.514713	0.48318	0.441983	0.00845475	0.758474	0.1817	0.0787149	0.0520629	0.835602	0.197053	0.741415	0.497547	0.46325	0.473544	0.937614	0.805
Latitude	r	0.310437	0.123221	0.231187	0.272773	0.281118	0.10866	0.312564	0.57528	0.415319	-0.237485	0.24027	-0.265638	0.735242	0.137896	-0.381075	-0.572451	0.624563	-0.124244	0.364296	0.0664307	0.33711	0.302732	0.274061	0.110261	-0.148831
	P	0.326069	0.702817	0.469706	0.391014	0.376091	0.73676	0.322588	0.0503456	0.179395	0.457341	0.451924	0.404009	0.00643582	0.669104	0.221642	0.0517543	0.029925	0.70045	0.244346	0.837476	0.283923	0.338844	0.38869	0.733005	0.644341
Longitude	r	-0.108836	0.141236	0.037886	-0.360805	-0.0490684	-0.352278	-0.0765306	-0.761128	-0.185884	0.155968	-0.191247	0.204576	-0.666932	-0.0347098	0.450111	0.434527	-0.467724	-0.0259831	-0.443925	-0.167001	-0.0188189	-0.117499	-0.149809	0.110688	-0.0326363
	P	0.736348	0.661507	0.906943	0.249234	0.879633	0.261417	0.813126	0.00403532	0.56298	0.628353	0.551562	0.523608	0.0178379	0.914718	0.142026	0.15808	0.125193	0.936115	0.148267	0.603926	0.95371	0.716099	0.642141	0.732004	0.919798
MAP	r	0.337144	0.16098	0.26859	0.257192	0.312589	0.0717438	0.344321	0.542393	0.445118	-0.24721	0.245182	-0.272081	0.738244	0.151767	-0.367252	-0.587267	0.641664	-0.145173	0.349074	0.050984	0.380743	0.327103	0.289728	0.141738	-0.174124
	P	0.283871	0.617212	0.398607	0.419669	0.322548	0.824649	0.27309	0.0684642	0.14705	0.438556	0.442441	0.392266	0.00611294	0.637745	0.24025	0.0446753	0.0244985	0.652589	0.266081	0.874965	0.222078	0.299353	0.361008	0.660367	0.588349
MAT	r	-0.275047	-0.0742984	-0.182342	-0.291819	-0.239712	-0.155682	-0.270682	-0.615484	-0.375589	0.224161	-0.233114	0.256429	-0.728794	-0.119598	0.397482	0.551408	-0.600401	0.0969305	-0.382558	-0.0860322	-0.27989	-0.27037	-0.252978	-0.0694515	0.115826
	P	0.386918	0.818496	0.570575	0.357392	0.453006	0.62899	0.3948	0.0331333	0.22892	0.483681	0.465907	0.421098	0.00717238	0.711219	0.200717	0.0631098	0.0389974	0.764423	0.219699	0.790356	0.378268	0.395367	0.427593	0.830179	0.719996
pH	r	-0.78085	-0.79465	-0.670529	-0.0802859	-0.778751	0.499966	-0.68742	0.236782	-0.679555	0.0326426	-0.391761	0.0877986	-0.533254	-0.359521	-0.127956	0.738623	-0.625805	0.190615	0.000847451	0.0522139	-0.789029	-0.395205	-0.458775	-0.510923	0.660169
	P	0.00271877	0.00201373	0.0170113	0.80411	0.00284066	0.0978814	0.0135006	0.458715	0.0150611	0.919783	0.20787	0.786138	0.0742035	0.251048	0.691882	0.0060731	0.0295041	0.552903	0.997914	0.871971	0.00228153	0.203546	0.133574	0.0895953	0.0194714
Salt	r	-0.642075	-0.705179	-0.613829	-0.439728	-0.657574	0.490104	-0.488233	0.443655	-0.463392	-0.389208	-0.369556	-0.172469	-0.444004	-0.307854	-0.325628	0.842434	-0.271855	-0.147234	-0.280577	-0.211073	-0.667708	-0.178175	-0.431858	-0.36141	0.717675
	P	0.0243776	0.0104193	0.033744	0.1526	0.0201264	0.105765	0.107307	0.148543	0.129206	0.211113	0.237086	0.591953	0.148186	0.330323	0.301667	0.000583401	0.392675	0.647937	0.377047	0.510207	0.0176572	0.579559	0.160941	0.248383	0.00858882
TK	r	-0.616531	-0.604918	-0.703593	-0.0926954	-0.586468	0.375036	-0.518435	-0.0285606	-0.592135	0.279628	-0.34843	0.224493	-0.627146	-0.303876	0.152273	0.759334	-0.686192	0.338206	-0.12389	0.0328157	-0.807499	-0.48742	-0.400405	-0.33382	0.484874
	P	0.0327516	0.0371696	0.0106709	0.774476	0.0450383	0.229662	0.0841968	0.929791	0.0425071	0.378732	0.267024	0.483016	0.0290546	0.336931	0.636611	0.00417537	0.013736	0.282261	0.701268	0.919359	0.00149191	0.107981	0.197121	0.288945	0.110112
TN	r	0.251099	0.0109072	0.011614	0.617186	0.183433	-0.0562059	0.313672	0.224885	0.451714	0.134057	0.217819	0.0593247	0.483244	0.106092	-0.196895	-0.621555	0.38748	0.371976	0.514637	0.17351	0.109379	0.158503	0.267366	0.221515	-0.461745
	P	0.431149	0.973162	0.971424	0.032514	0.568232	0.862262	0.320784	0.482233	0.140437	0.677873	0.496456	0.854688	0.111491	0.742792	0.539642	0.0309621	0.213324	0.23379	0.0868981	0.589685	0.735074	0.622708	0.400842	0.488993	0.130754
TP	r	-0.239838	-0.513534	-0.518601	0.272071	-0.222945	0.569317	0.0466045	0.695536	0.174537	-0.00354378	-0.0534985	-0.124797	0.394808	-0.106949	-0.218734	0.15758	0.147265	0.16062	0.472264	-0.0898878	-0.38576	-0.0824348	0.116279	0.107003	0.30049
	P	0.452761	0.0876928	0.0840803	0.392284	0.486118	0.053347	0.885641	0.0120189	0.587449	0.991279	0.868845	0.699172	0.204042	0.740778	0.494603	0.624761	0.647868	0.618009	0.121077	0.781158	0.215539	0.79896	0.718941	0.740652	0.342612

## Sheet: TableS8
Table S8. Correlations between major taxa of bacteria and explanatory variables in barelands.
Variables	Statics	KD4-96	Anaerolinea	WD2101_soil_group	A4b	Pirellula	Truepera	MB-A2-108	Longimicrobiaceae	Nitrososphaeraceae	Luteolibacter	Ellin6067	IMCC26256	Vicinamibacteraceae	Bacteroidetes_vadinHA17	OPB41	Halomonas	Subgroup_7	Nodosilinea_PCC-7104	Pir4_lineage	Ilumatobacter	SJA-15	MND1	Subgroup_17	RB41	Aquiflexum
Altitude	r	0.236735	0.0982151	0.651419	-0.437841	0.137732	0.256328	-0.329491	-0.821969	0.719467	-0.548124	0.393338	0.1352	0.106461	0.422512	0.224443	-0.572655	0.0389363	0.17214	-0.604451	0.308507	0.147315	-0.135471	0.672581	0.467693	0.110856
	P	0.510201	0.787215	0.0413034	0.205678	0.704362	0.474695	0.352522	0.00352393	0.0189982	0.100921	0.260792	0.709596	0.769739	0.223827	0.533024	0.0835964	0.914956	0.634406	0.0641672	0.385786	0.68465	0.709037	0.0330937	0.172866	0.760461
Latitude	r	0.313127	0.150171	0.697034	-0.481943	0.134508	0.195502	-0.253273	-0.804738	0.75061	-0.529849	0.395026	0.210878	0.093099	0.343799	0.26192	-0.591198	0.12295	0.223712	-0.59095	0.366853	0.208989	-0.148159	0.648739	0.532849	0.177748
	P	0.378335	0.67881	0.0250774	0.158381	0.71103	0.588313	0.480159	0.00498757	0.0123664	0.115199	0.258567	0.558677	0.798102	0.330705	0.464764	0.0718613	0.735076	0.534396	0.0720108	0.297068	0.562286	0.682922	0.0424322	0.112773	0.62323
Longitude	r	-0.0966191	-0.005035	-0.550569	0.346803	-0.138669	-0.352905	0.450231	0.824083	-0.641358	0.561268	-0.377166	0.000259114	-0.125987	-0.544432	-0.152056	0.521288	0.107699	-0.0771323	0.607442	-0.197188	-0.0356714	0.108958	-0.691163	-0.339231	0.00858712
	P	0.790608	0.988986	0.0991002	0.326214	0.702428	0.317192	0.191653	0.00336863	0.0456467	0.0913793	0.282637	0.999433	0.728737	0.103709	0.674963	0.1223	0.767121	0.832273	0.0625093	0.585035	0.922068	0.764465	0.0268649	0.337592	0.981217
MAP	r	0.339678	0.168448	0.711104	-0.496217	0.13287	0.172806	-0.224804	-0.795687	0.759255	-0.521382	0.394255	0.237527	0.0879378	0.31411	0.274566	-0.59584	0.152924	0.241593	-0.583996	0.386685	0.230577	-0.152233	0.637841	0.554565	0.201334
	P	0.336916	0.641799	0.0211293	0.144631	0.714423	0.633074	0.532349	0.00590901	0.0108618	0.12222	0.259581	0.508745	0.809117	0.376759	0.442653	0.0691013	0.673193	0.501297	0.0762827	0.269663	0.521584	0.674601	0.047234	0.0961698	0.577004
MAT	r	-0.277333	-0.125715	-0.676567	0.461813	-0.136281	-0.224793	0.28999	0.814366	-0.737124	0.539486	-0.394924	-0.175242	-0.0996224	-0.381864	-0.244552	0.583425	-0.0831909	-0.199569	0.598424	-0.339741	-0.180013	0.142385	-0.661236	-0.502792	-0.146234
	P	0.437881	0.729304	0.0316827	0.179064	0.707361	0.53237	0.416354	0.00412508	0.0149964	0.107522	0.2587	0.628216	0.784226	0.276193	0.495904	0.0766411	0.819274	0.580419	0.0675958	0.33682	0.618735	0.694772	0.0373422	0.138551	0.686867
pH	r	0.00828448	0.0994865	-0.61938	0.33504	-0.175184	-0.243206	0.53583	0.843457	-0.67158	0.621971	-0.268425	0.0967663	-0.130154	-0.440284	-0.208055	0.588673	0.135232	-0.141694	0.574294	-0.26683	-0.0504032	-0.0478296	-0.700811	-0.353451	0.0882355
	P	0.981879	0.784515	0.0561721	0.343976	0.628331	0.498355	0.110395	0.00216522	0.0334547	0.0548553	0.453331	0.790295	0.720062	0.202867	0.564075	0.0733917	0.709532	0.696193	0.0825127	0.456122	0.890023	0.895612	0.0239717	0.316392	0.80848
Salt	r	-0.406899	-0.359328	-0.405368	-0.22739	0.211518	0.148539	-0.263353	0.290802	-0.487065	-0.193218	-0.199018	-0.374664	-0.504014	-0.236669	-0.444502	-0.0808675	-0.638381	-0.270578	0.3692	-0.288365	-0.355238	0.779853	-0.391445	-0.391757	-0.438267
	P	0.243215	0.307839	0.245165	0.527516	0.557456	0.682147	0.462235	0.41499	0.15336	0.592764	0.581485	0.286103	0.137439	0.510324	0.198066	0.824255	0.046988	0.449575	0.29375	0.419091	0.313778	0.00780262	0.263299	0.262885	0.205187
TK	r	-0.439387	-0.209544	-0.737905	0.589469	-0.121165	-5.2262e-05	0.0635224	0.639257	-0.688316	0.223687	-0.291726	-0.29156	0.136758	0.0614901	-0.177399	0.467964	-0.489378	-0.371836	0.538239	-0.498004	-0.374642	0.215022	-0.442663	-0.695589	-0.23799
	P	0.203897	0.561225	0.0148343	0.0729068	0.738809	0.999886	0.861604	0.0465905	0.0277625	0.534442	0.413442	0.413719	0.706375	0.865998	0.623924	0.172584	0.151124	0.290047	0.108496	0.142963	0.286134	0.55079	0.200151	0.0255097	0.507895
TN	r	-0.492435	-0.338347	-0.2952	0.196963	-0.0609427	0.692483	-0.569817	-0.246534	-0.118488	-0.26691	0.252129	-0.470137	0.102175	0.812265	-0.274183	0.0942241	-0.669957	-0.335925	-0.286128	-0.362226	-0.392597	-0.0507523	0.206136	-0.368894	-0.416895
	P	0.148201	0.338935	0.407642	0.585472	0.867182	0.0264557	0.085495	0.492307	0.744415	0.455981	0.482211	0.170328	0.778811	0.00430343	0.443316	0.795705	0.0340455	0.342624	0.422869	0.303667	0.261772	0.889265	0.567755	0.294181	0.230697
TP	r	-0.353233	-0.112127	-0.663563	0.804641	-0.168689	-0.0509666	0.141547	0.587522	-0.577063	0.324726	-0.287146	-0.225539	0.387391	0.21467	-0.00507435	0.533816	-0.299321	-0.331767	0.451773	-0.445602	-0.315859	-0.0804144	-0.290932	-0.615375	-0.144515
	P	0.316711	0.757783	0.0364423	0.00499681	0.641315	0.8888	0.696496	0.0740963	0.0807026	0.359945	0.421148	0.530974	0.268714	0.551458	0.9889	0.111998	0.400812	0.349004	0.189948	0.196826	0.373964	0.825227	0.414773	0.0582487	0.690394

## Sheet: TableS9
Table S9. Summary of the topological parameters of ecological networks of bacteria across wetlands, grasslands, and barelands.
Topology	Wetland	Grassland	Bareland
Node	801	961	748
Edge	1127	1413	885
Positive edge	1120	1407	883
Negative edge	7	6	2
Density	0.00351748	0.00306322	0.00316775
Average degree	2.81398	2.94069	2.36631
Average path length	2.50466	2.44515	3.50467
Transitivity	0.0171184	0.0156571	0.0172932
Clusters	16	9	12
Betweenness centralization	0.121702	0.0819192	0.121382
Degree centralization	0.0314825	0.0281868	0.0396703
Diameter	6.42405	6.99994	9.5258
Modularity1a	0.725246	0.700384	0.841399
Modularity2b	0.671108	0.63312	0.756251
aModularity 1: The modularity score calculated based on the Louvain algorithm (multilevel community detection).
bModularity 2: The modularity score calculated based on the Label Propagation Algorithm (LPA).

## Sheet: TableS10
Table S10. Contributions of various assembly processes to bacterial communities across wetlands, grasslands, and barelands.
Group	Heterogeneous. Selection	Homogeneous. Selection	Dispersal. Limitation	Homogenizing. Dispersal	Drift.and Others
Wetland	0.0186395	0.116535	0.317107	0.0115092	0.53621
Grassland	0.0140344	0.12651	0.315515	0.00771799	0.536222
Bareland	0.0869625	0.122218	0.34969	0.0153192	0.42581
Wetland vs Grassland	0.0189763	0.115299	0.319903	0.0105227	0.535299
Wetland vs Bareland	0.065185	0.0963281	0.341634	0.00956875	0.487284
Grassland vs Bareland	0.0558573	0.110209	0.340042	0.0105856	0.483306

[truncated: 3 more sheets: TableS11, TablesS12, TablesS13]
